# Supplementary material for: Hollow TiO2 Nanoparticles Capped with Polarizability-Tunable Conducting Polymers for Improved Electrorheological Activity
Source: MDPI journal article supplement (doi:10.3390/nano12193521), 2022-10-08
Supplement: s1 [file s1]

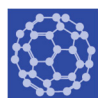

Supplementary Materials

# Hollow TiO<sub>2</sub> Nanoparticles Capped with Polarizability-Tunable Conducting Polymers for Improved Electrorheological Activity

Seungae Lee <sup>1</sup>, Jungchul Noh <sup>2</sup>, Suk Jekal <sup>3</sup>, Jiwon Kim <sup>3</sup>, Won-Chun Oh <sup>4</sup>, Hyung-Sub Sim <sup>5</sup>, Hyoung-Jin Choi <sup>6,7</sup>, Hyeonseok Yi <sup>8</sup> and Chang-Min Yoon <sup>3,\*</sup>

<sup>1</sup> Department of Chemical Engineering, Konkuk University, Seoul 05029, Korea

<sup>2</sup> McKetta Department of Chemical Engineering and Texas Material Institute, The University of Texas at Austin, Austin, TX 78712, USA

<sup>3</sup> Department of Chemical and Biological Engineering, Hanbat National University, Daejeon 34158, Korea

<sup>4</sup> Department of Advanced Materials Science and Engineering, Hanseo University, Seosan-si 31962, Korea

<sup>5</sup> Department of Aerospace Engineering, Sejong University, Seoul 05006, Korea

<sup>6</sup> Department of Polymer Science and Engineering, Inha University, Incheon 22212, Korea

<sup>7</sup> Program of Environmental and Polymer Engineering, Inha University, Incheon 22212, Korea

<sup>8</sup> Institute for Materials Chemistry and Engineering, Kyushu University, Fukuoka 816-8580, Japan

\* Correspondence: cmyoon4321@hanbat.ac.kr; Tel.: +82-42-821-1528; Fax: +82-42-821-1593

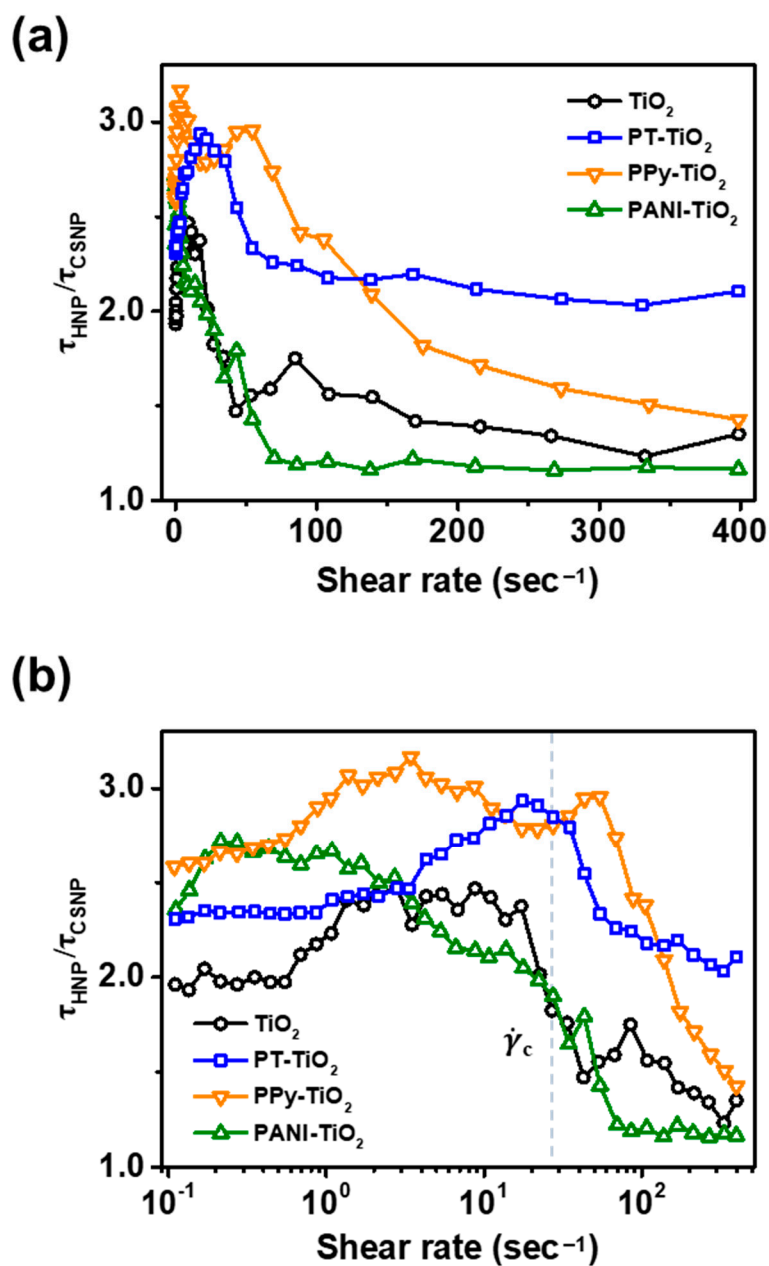

**Figure S1.** Improvement shear stress ratio ( $\tau_{HNP}/\tau_{CSNP}$ ) of bare, PT-, PPy-, and PANI-capped HNPs to CSNPs measured by varying the shear rate (a) as a decimal scale and (b) a log scale at a constant electric field strength of 3.0 kV mm<sup>-1</sup>.

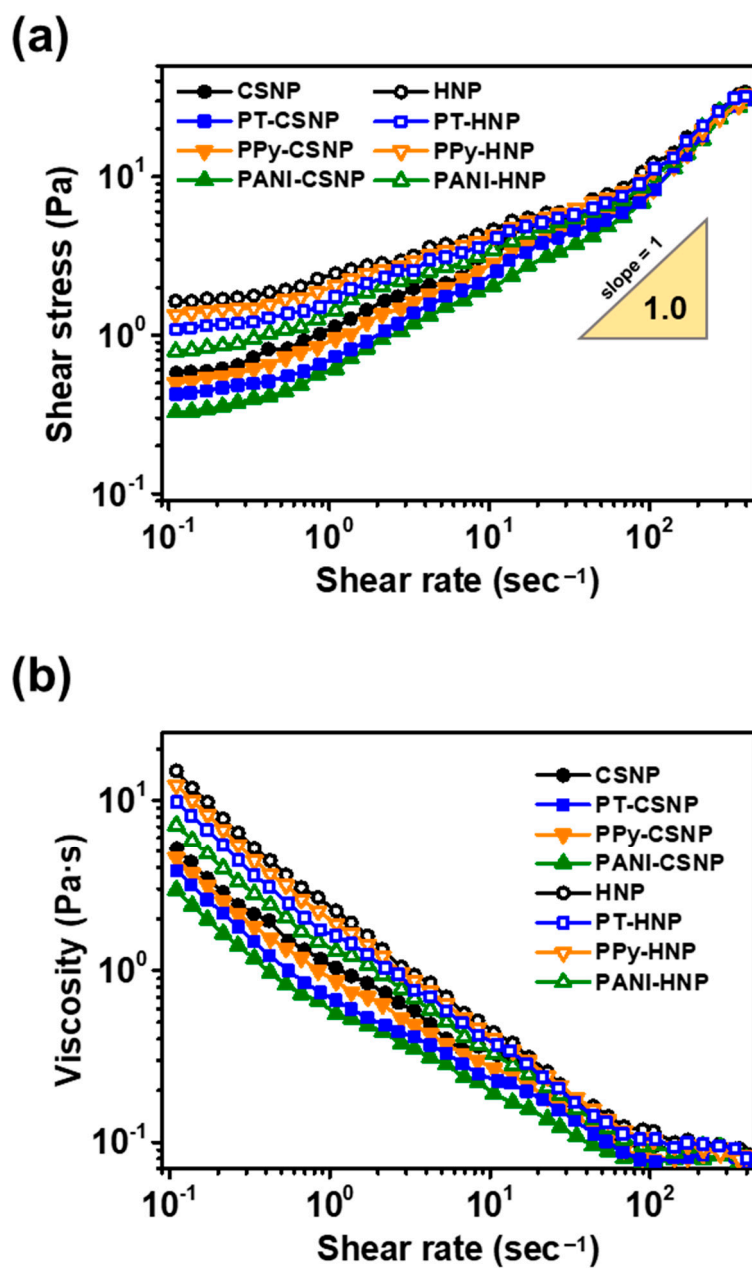

Figure S2. (a) Shear stress and (b) viscosity of CSNPs and HNPs obtained before and after polymer capping with PT, PPy, and PANI dispersed in silicone oil (3.0 wt%) measured by varying the shear rate without an electric field.
